# Supplementary material for: A nickel silicate MFI-type zeolite catalyst prepared by interzeolite transformation: tailoring the catalytic active sites for glucose conversion
Source: Royal Society of Chemistry journal article supplement (doi:10.1039/d4ta02147a), 2024-01-01
Supplement: d4ta02147a1.pdf [file d4ta02147a1.pdf]

Electronic supporting information

**Nickel silicate MFI-type zeolite catalyst prepared by interzeolite transformation: Tailoring the catalytic active sites for glucose conversion†**

Sungjoon Kweon,<sup>a</sup> Yunhye Cho,<sup>a</sup> Jun Seong Park,<sup>a</sup> Jiae Ryu,<sup>b</sup> Chang Geun Yoo,<sup>b</sup> Hyung-Ki Min<sup>c</sup>  
and Min Bum Park<sup>\*ab</sup>

<sup>a</sup>*Department of Energy and Chemical Engineering, Incheon National University, Incheon 22012, Korea*

<sup>b</sup>*Department of Chemical Engineering, State University of New York College of Environmental Science and Forestry, Syracuse, New York 13210, United States*

<sup>c</sup>*Hydrogen & Cl Gas Research Center, Korea Research Institute of Chemical Technology, Daejeon 34114, Korea*

†Electronic supplementary information (ESI) available. See DOI: xxx

**Table S1** Relative ratios of intermediate Ni and isolated Ni of Ni-MFI(*x*)(*y*) solids determined by UV-DRS, Ni 2p XPS, and CD<sub>3</sub>CN-IR

| Sample <sup>a</sup> | Crystallization time (h) | Ni <sub>intermediate</sub> /Ni <sub>isolated</sub> |                        |                                    |
|---------------------|--------------------------|----------------------------------------------------|------------------------|------------------------------------|
|                     |                          | UV-DRS <sup>b</sup>                                | Ni 2p XPS <sup>c</sup> | CD <sub>3</sub> CN-IR <sup>d</sup> |
| Ni-MFI(135)         | 1                        | 1.29                                               | 1.22                   | 1.27                               |
|                     | 3                        | 1.65                                               | 1.70                   | 1.67                               |
|                     | 6                        | 1.82                                               | 1.85                   | 1.83                               |
|                     | 12                       | 1.88                                               | 1.89                   | 1.93                               |
|                     | 24                       | 1.70                                               | 1.70                   | 1.68                               |
|                     | 72                       | 1.73                                               | 1.76                   | 1.80                               |
|                     | 168                      | 1.29                                               | 1.27                   | 1.25                               |
|                     | Ni-MFI(150)              | 1                                                  | 1.45                   | 1.41                               |
| 3                   |                          | 1.54                                               | 1.56                   | 1.50                               |
| 6                   |                          | 1.30                                               | 1.42                   | 1.29                               |
| 12                  |                          | 1.39                                               | 1.39                   | 1.33                               |
| 24                  |                          | 0.64                                               | 0.65                   | 0.62                               |
| 72                  |                          | 0.57                                               | 0.58                   | 0.56                               |
| 168                 |                          | 0.43                                               | 0.47                   | 0.43                               |
| Ni-MFI(190)         |                          | 1                                                  | 1.50                   | 1.51                               |
|                     | 3                        | 0.74                                               | 0.76                   | 0.74                               |
|                     | 6                        | 0.50                                               | 0.51                   | 0.50                               |
|                     | 12                       | 0.17                                               | 0.16                   | 0.17                               |
|                     | 24                       | 0.13                                               | 0.13                   | 0.15                               |
|                     | 72                       | 0.12                                               | 0.10                   | 0.12                               |
|                     | 168                      | 0.10                                               | 0.08                   | 0.10                               |

<sup>a</sup> Calcined at 550 °C for 8 h. <sup>b</sup> Determined by the relative ratio of integrated areas of UV absorption peaks at around 260 and 200 nm. <sup>c</sup> Determined by the relative ratio of the integrated areas of Ni 2p<sub>3/2</sub> XPS peaks at around 757.5 and 758.1 eV. <sup>d</sup> Determined by the relative ratio of the integrated areas of CD<sub>3</sub>CN-absorption IR peaks at around 2306 and 2311 cm<sup>-1</sup>.

**Table S2** Binding energies of Ni 2p<sub>3/2</sub> and Si 2p XPS spectra for Ni-MFI(x)(y) solids prepared in this study

| Sample <sup>a</sup> | Crystallization<br>time (h) | Binding energy (eV)  |       |       |                             |       |
|---------------------|-----------------------------|----------------------|-------|-------|-----------------------------|-------|
|                     |                             | Ni 2p <sub>3/2</sub> |       | Si 2p | $\Delta E_{\text{Ni-Si}}^b$ |       |
| Ni-MFI(135)         | 1                           | 857.5                | 858.1 | 104.3 | 753.2                       | 753.8 |
|                     | 3                           | 857.5                | 858.1 | 104.2 | 753.3                       | 753.9 |
|                     | 6                           | 857.5                | 858.4 | 104.5 | 753.0                       | 753.9 |
|                     | 12                          | 857.7                | 858.1 | 104.6 | 753.1                       | 753.5 |
|                     | 24                          | 857.8                | 858.2 | 104.6 | 753.2                       | 753.6 |
|                     | 72                          | 857.5                | 858.1 | 104.1 | 753.4                       | 754.0 |
|                     | 168                         | 857.5                | 858.0 | 104.2 | 753.3                       | 753.8 |
| Ni-MFI(150)         | 1                           | 857.6                | 858.0 | 104.5 | 753.1                       | 753.5 |
|                     | 3                           | 857.5                | 858.2 | 104.4 | 753.1                       | 753.8 |
|                     | 6                           | 857.6                | 858.1 | 104.5 | 753.1                       | 753.6 |
|                     | 12                          | 857.7                | 858.5 | 104.6 | 753.1                       | 753.9 |
|                     | 24                          | 857.5                | 858.1 | 104.3 | 753.2                       | 753.8 |
|                     | 72                          | 857.3                | 858.0 | 104.3 | 753.0                       | 753.7 |
|                     | 168                         | 857.7                | 858.3 | 104.5 | 753.2                       | 753.8 |
| Ni-MFI(190)         | 1                           | 857.2                | 858.2 | 104.2 | 753.0                       | 754.0 |
|                     | 3                           | 857.5                | 858.1 | 104.4 | 753.1                       | 753.7 |
|                     | 6                           | 857.6                | 858.1 | 104.3 | 753.3                       | 753.8 |
|                     | 12                          | 857.5                | 858.0 | 104.1 | 753.4                       | 753.9 |
|                     | 24                          | 857.2                | 858.0 | 104.1 | 753.1                       | 753.9 |
|                     | 72                          | 857.3                | 858.0 | 104.1 | 753.2                       | 753.9 |
|                     | 168                         | 857.2                | 858.0 | 104.2 | 753.0                       | 753.8 |

<sup>a</sup> Calcined at 550 °C for 8 h. <sup>b</sup> Binding energy differences between Ni 2p<sub>3/2</sub> and Si 2p XPS peaks.

**Table S3** Amounts of water adsorbed on Ni-MFI(x)(y) solids prepared in this study

| Sample <sup>a</sup> | Crystallization time (h) | Water (wt. %) <sup>b</sup> |
|---------------------|--------------------------|----------------------------|
| Ni-MFI(135)         | 1                        | 5.9                        |
|                     | 3                        | 7.7                        |
|                     | 6                        | 6.0                        |
|                     | 12                       | 6.2                        |
|                     | 24                       | 5.5                        |
|                     | 72                       | 4.5                        |
|                     | 168                      | 4.2                        |
| Ni-MFI(150)         | 1                        | 4.7                        |
|                     | 3                        | 4.8                        |
|                     | 6                        | 4.2                        |
|                     | 12                       | 3.2                        |
|                     | 24                       | 3.1                        |
|                     | 72                       | 2.8                        |
|                     | 168                      | 2.7                        |
| Ni-MFI(190)         | 1                        | 3.1                        |
|                     | 3                        | 2.8                        |
|                     | 6                        | 2.8                        |
|                     | 12                       | 2.3                        |
|                     | 24                       | 1.8                        |
|                     | 72                       | 1.7                        |
|                     | 168                      | 1.3                        |

<sup>a</sup> Calcined at 550 °C for 8 h. <sup>b</sup> Determined by the weight loss at RT–100 °C in TGA/DTA of calcined Ni-MFI(x)(y) solids exposed for 1 d in ambient condition (Fig. S20†).

**Table S4** Acidities of Ni-MFI(*x*)(*y*) solids determined by IR spectra after pyridine adsorption at 100–450 °C

| Sample <sup>a</sup> | Crystallization time (h) | Concentration of Lewis / Brønsted acid sites (μmol g <sup>-1</sup> ) <sup>b</sup> |          |         |        |        | Reduction rate (%) <sup>c</sup> |          |
|---------------------|--------------------------|-----------------------------------------------------------------------------------|----------|---------|--------|--------|---------------------------------|----------|
|                     |                          | 100 °C                                                                            | 200 °C   | 300 °C  | 400 °C | 450 °C | Lewis                           | Brønsted |
| Ni-MFI(135)         | 1                        | 434 / 64                                                                          | 125 / 43 | 14 / 19 | – / –  | – / –  | 97                              | 71       |
|                     | 3                        | 355 / 79                                                                          | 111 / 47 | 6 / 24  | – / –  | – / –  | 98                              | 69       |
|                     | 6                        | 326 / 85                                                                          | 54 / 53  | 1 / 28  | – / –  | – / –  | 100                             | 67       |
|                     | 12                       | 282 / 93                                                                          | 38 / 47  | 1 / 20  | – / –  | – / –  | 100                             | 78       |
|                     | 24                       | 226 / 83                                                                          | 34 / 71  | 1 / 31  | – / –  | – / –  | 100                             | 63       |
|                     | 72                       | 268 / 76                                                                          | 28 / 46  | 7 / 20  | – / –  | – / –  | 98                              | 75       |
|                     | 168                      | 174 / 89                                                                          | 34 / 68  | 1 / 35  | – / –  | – / –  | 99                              | 61       |
| Ni-MFI(150)         | 1                        | 221 / 74                                                                          | 58 / 52  | 45 / 41 | – / –  | – / –  | 95                              | 44       |
|                     | 3                        | 204 / 85                                                                          | 28 / 65  | 14 / 39 | – / –  | – / –  | 93                              | 55       |
|                     | 6                        | 213 / 80                                                                          | 29 / 58  | 3 / 43  | – / –  | – / –  | 98                              | 46       |
|                     | 12                       | 216 / 98                                                                          | 28 / 82  | 9 / 56  | – / –  | – / –  | 96                              | 42       |
|                     | 24                       | 238 / 72                                                                          | 34 / 37  | 24 / 31 | – / –  | – / –  | 90                              | 57       |
|                     | 72                       | 241 / 70                                                                          | 40 / 43  | 37 / 37 | – / –  | – / –  | 85                              | 48       |
|                     | 168                      | 253 / 68                                                                          | 50 / 41  | 40 / 34 | – / –  | – / –  | 84                              | 50       |
| Ni-MFI(190)         | 1                        | 210 / 77                                                                          | 46 / 57  | 29 / 34 | – / 15 | – / –  | 89                              | 43       |
|                     | 3                        | 198 / 58                                                                          | 26 / 55  | 25 / 28 | – / 16 | – / –  | 87                              | 52       |
|                     | 6                        | 250 / 47                                                                          | 65 / 35  | 35 / 25 | – / 11 | – / –  | 86                              | 48       |
|                     | 12                       | 259 / 36                                                                          | 47 / 32  | 36 / 19 | – / 10 | – / –  | 86                              | 46       |
|                     | 24                       | 288 / 25                                                                          | 65 / 12  | 46 / 11 | – / –  | – / –  | 84                              | 54       |
|                     | 72                       | 294 / 28                                                                          | 81 / 23  | 53 / 15 | – / –  | – / –  | 82                              | 46       |
|                     | 168                      | 322 / 28                                                                          | 66 / 19  | 62 / 15 | – / –  | – / –  | 81                              | 46       |

<sup>a</sup> Calcined at 550 °C for 8 h. <sup>b</sup> The concentrations of Lewis and Brønsted acid sites were determined from the intensities of the py-IR bands at approximately 1450 and 1550 cm<sup>-1</sup>, respectively (Figs. S21–S23†). <sup>c</sup> Reduction rate of Brønsted and Lewis acid concentrations determined between 100 and 300 °C.

**Table S5** Comparison of catalytic results for glucose conversion between this work and previous studies

| Catalyst                                                        | Glucose conversion condition |          |                      | Glucose conversion (%) | 5-HMF yield (%) | Ref.       |
|-----------------------------------------------------------------|------------------------------|----------|----------------------|------------------------|-----------------|------------|
|                                                                 | Temp. (°C)                   | Time (h) | Solvent              |                        |                 |            |
| Ni-MFI(190)(1)                                                  | 160                          | 24       | DMSO + DI water      | 81                     | 40              | This study |
| LaCl <sub>3</sub> + HCl                                         | 170                          | 4        | NaCl + DI water      | 87                     | 38              | 16         |
| Sn-Beta + HCl                                                   | 160                          | 1.5      | 1-Butanol + DI water | 77                     | 20              | 23         |
| H <sub>3</sub> PO <sub>4</sub> -carbon-FePO <sub>4</sub> (0.15) | 160                          | 1.5      | Acetone + DI water   | 58                     | 22              | 59         |
| Ta <sub>2</sub> O <sub>5</sub>                                  | 175                          | 1.5      | MIBK + DI water      | 69                     | 23              | 60         |
| Al-MCM-41                                                       | 195                          | 2.5      | MIBK + DI water      | 87                     | 36              | 61         |
| 0.2-SnO <sub>x</sub> /C-500                                     | 170                          | 2        | THF + DI water       | 77                     | 35              | 62         |
| U66SA                                                           | 150                          | 24       | DMSO + DI water      | 23                     | 35              | 63         |
| TaPO                                                            | 170                          | 1        | MIBK + DI water      | 56                     | 33              | 64         |
| MIL-101(Cr, Sn)-0.1                                             | 140                          | 1        | NaCl + DMAc          | 75                     | 33              | 65         |

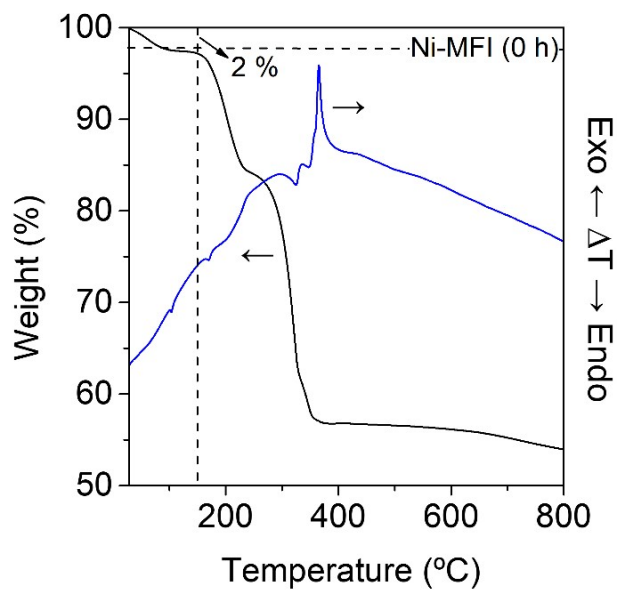

**Fig. S1** TGA/DTA curves of dried powder denoted as Ni-MFI(0 h).

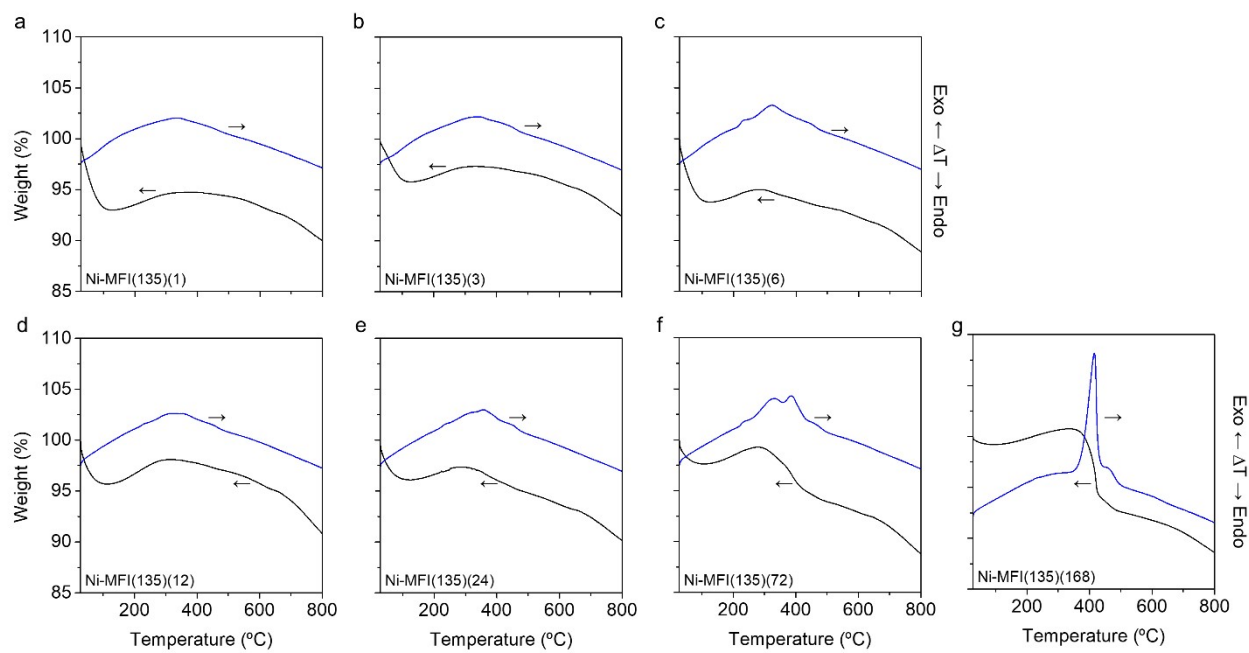

**Fig. S2** TGA/DTA curves of Ni-MFI( $x$ )( $y$ ) solids synthesized at 135 °C for (a) 1 h, (b) 3 h, (c) 6 h, (d) 12 h, (e) 24 h, (f) 72 h, and (g) 168 h.



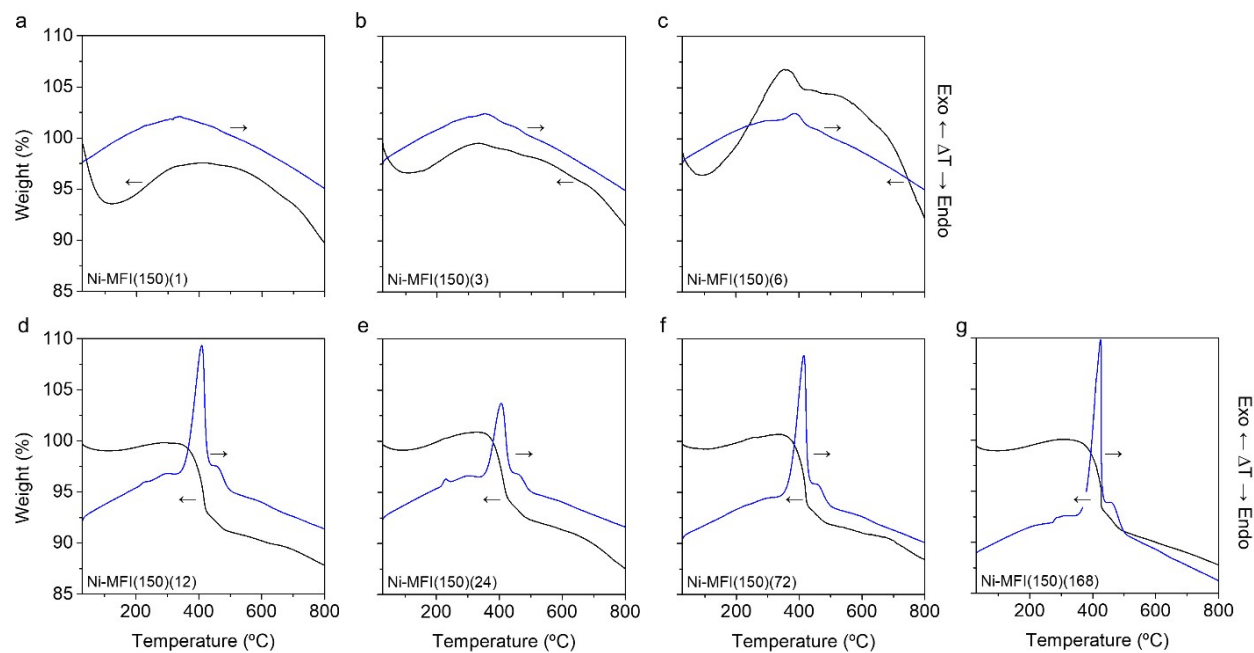

**Fig. S3** TGA/DTA curves of Ni-MFI(x)(y) solids synthesized at 150 °C for (a) 1 h, (b) 3 h, (c) 6 h, (d) 12 h, (e) 24 h, (f) 72 h, and (g) 168 h.

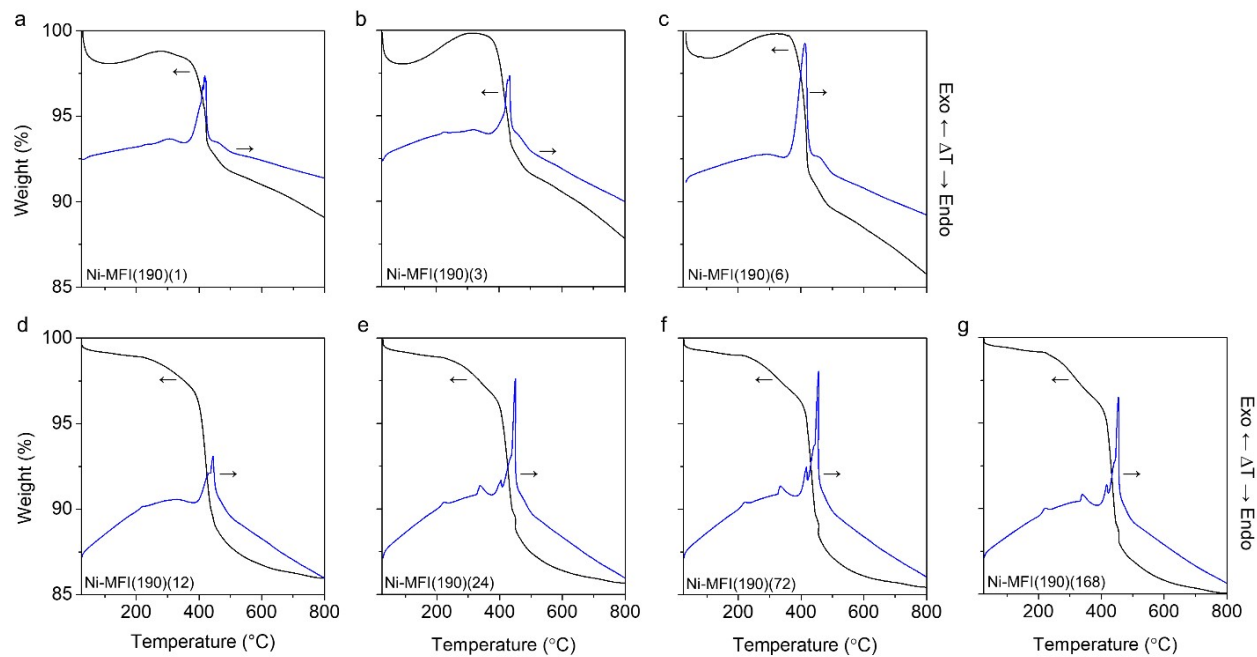

**Fig. S4** TGA/DTA curves of Ni-MFI( $x$ )( $y$ ) solids synthesized at 190 °C for (a) 1 h, (b) 3 h, (c) 6 h, (d) 12 h, (e) 24 h, (f) 72 h, and (g) 168 h.

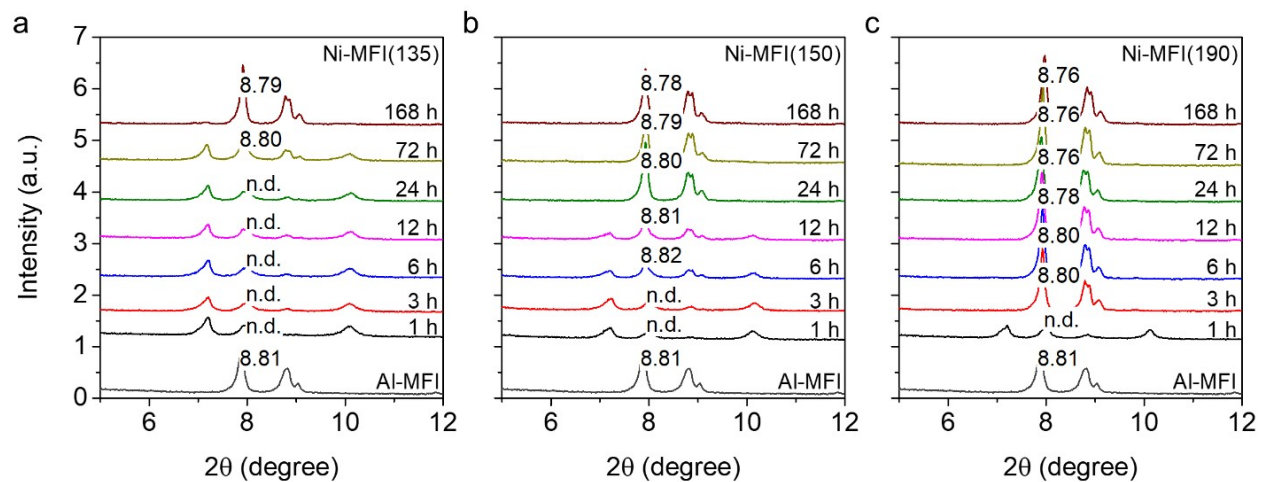

**Fig. S5** Powder XRD patterns of Ni-MFI( $x$ )( $y$ ) solids synthesized at (a) 135 °C, (b) 150 °C, and (c) 190 °C in the magnified  $2\theta = 5\text{--}12^\circ$ . For comparison, the pattern of Al-MFI was added.

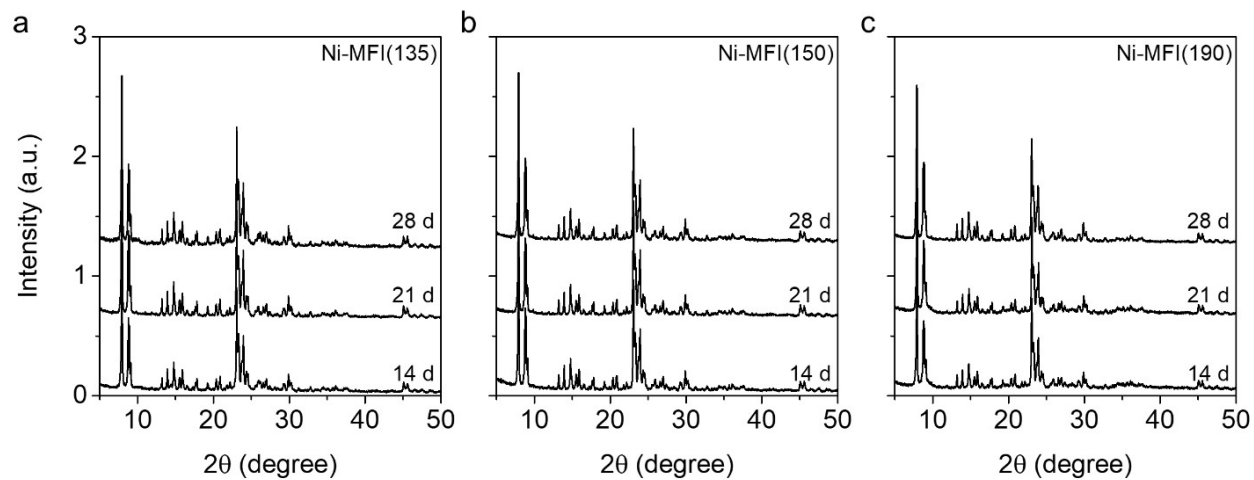

**Fig. S6** Powder XRD patterns of Ni-MFI( $x$ )( $y$ ) solids synthesized at (a) 135 °C, (b) 150 °C, and (c) 190 °C for 14–28 d.

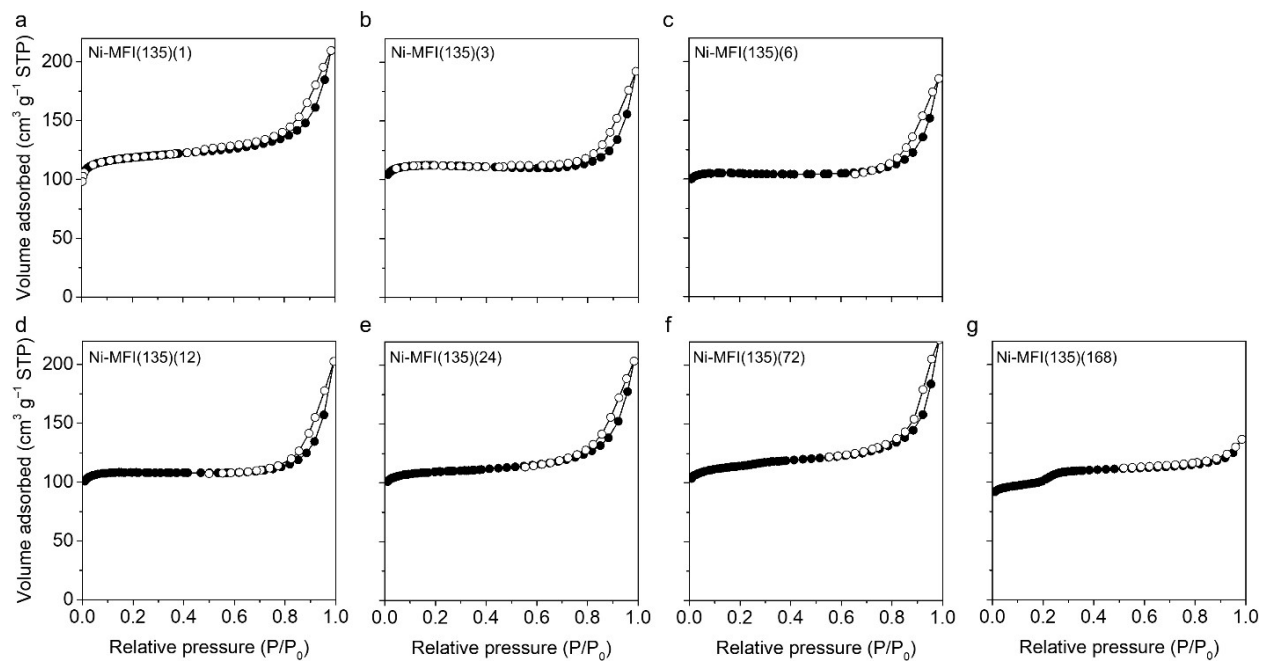

**Fig. S7** N<sub>2</sub> sorption isotherms of Ni-MFI( $x$ )( $y$ ) solids synthesized at 135 °C for (a) 1 h, (b) 3 h, (c) 6 h, (d) 12 h, (e) 24 h, (f) 72 h, and (g) 168 h.

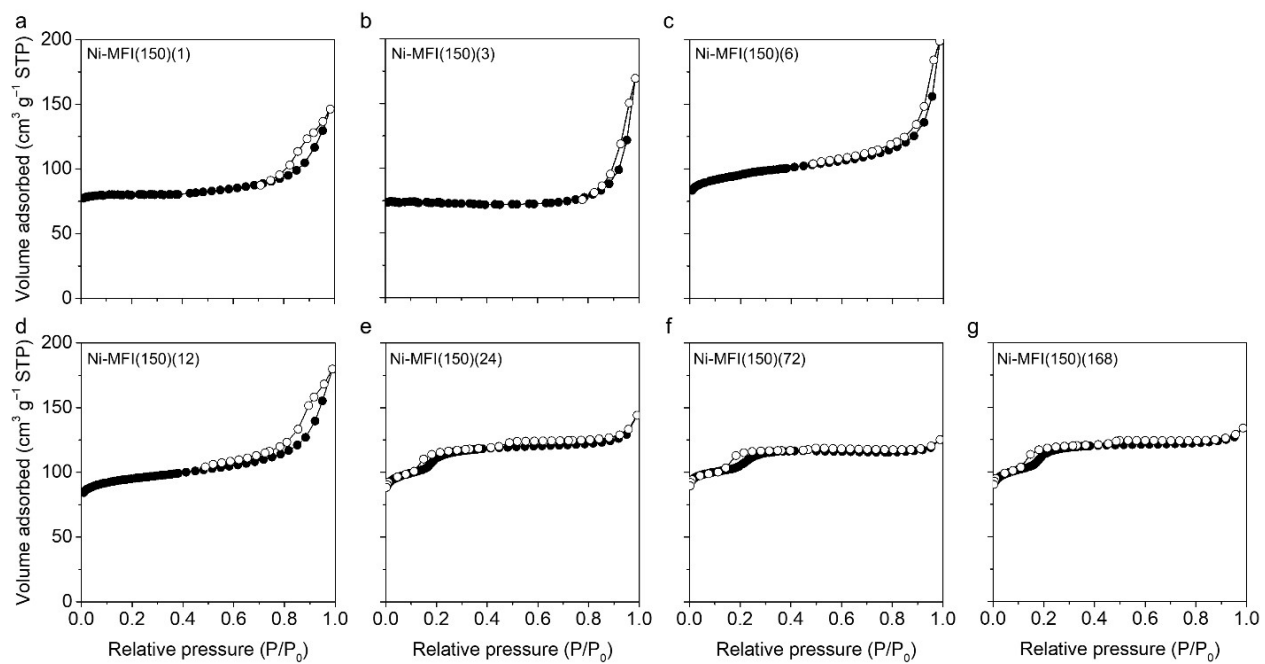

**Fig. S8** N<sub>2</sub> sorption isotherms of Ni-MFI(*x*)(*y*) solids synthesized at 150 °C for (a) 1 h, (b) 3 h, (c) 6 h, (d) 12 h, (e) 24 h, (f) 72 h, and (g) 168 h.

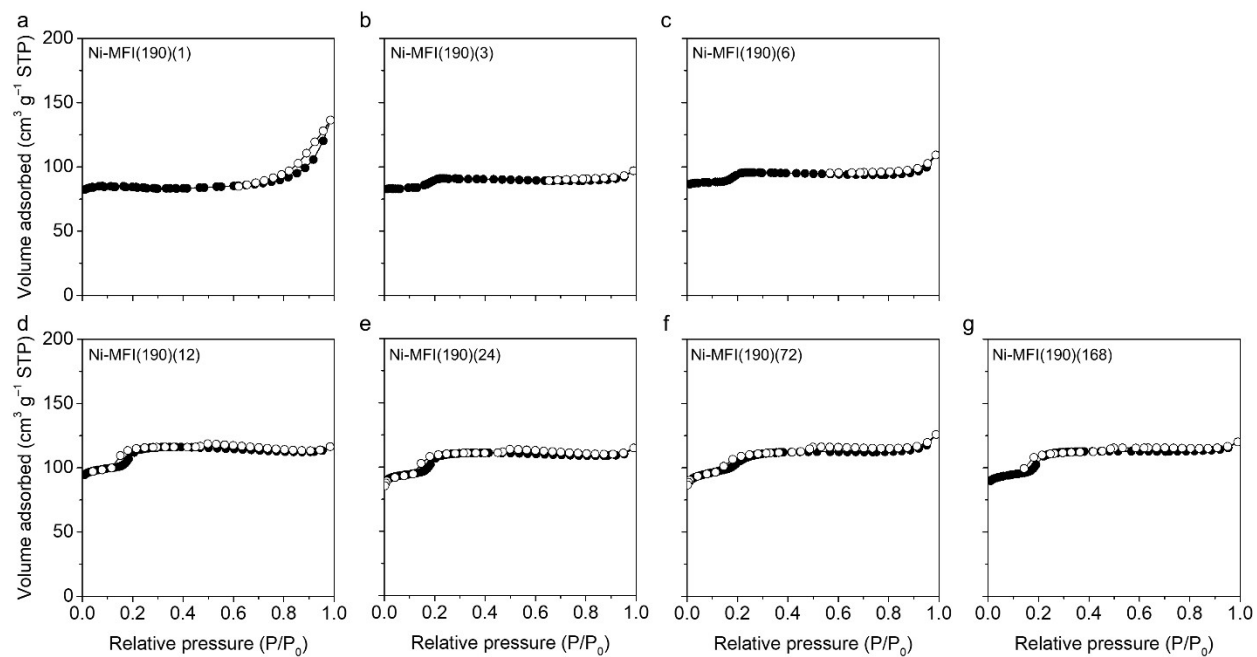

**Fig. S9** N<sub>2</sub> sorption isotherms of Ni-MFI(*x*)(*y*) solids synthesized at 190 °C for (a) 1 h, (b) 3 h, (c) 6 h, (d) 12 h, (e) 24 h, (f) 72 h, and (g) 168 h.

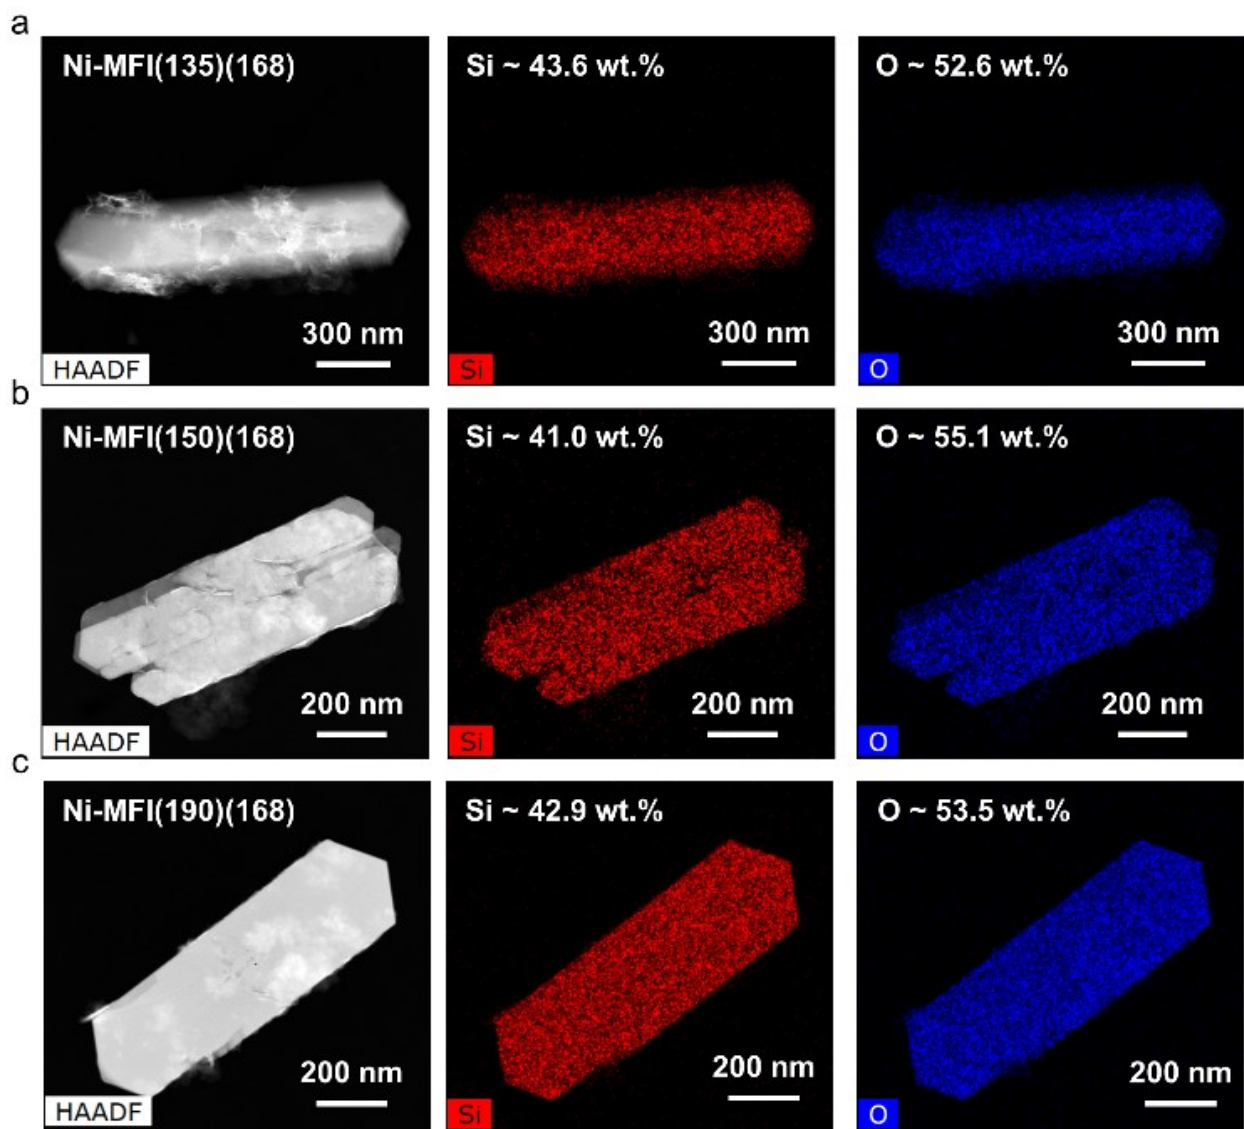

**Fig. S10** STEM-EDS images of (a) Ni-MFI(135)(168), (b) Ni-MFI(150)(168), and (c) Ni-MFI(190)(168).



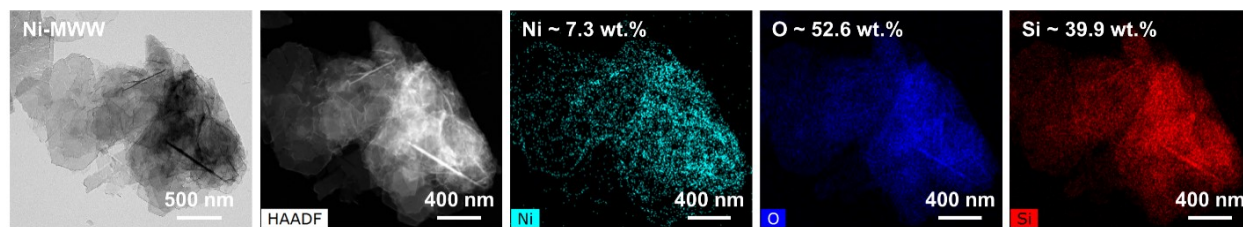

**Fig. S11** (S)TEM-EDS images of Ni-MWW.

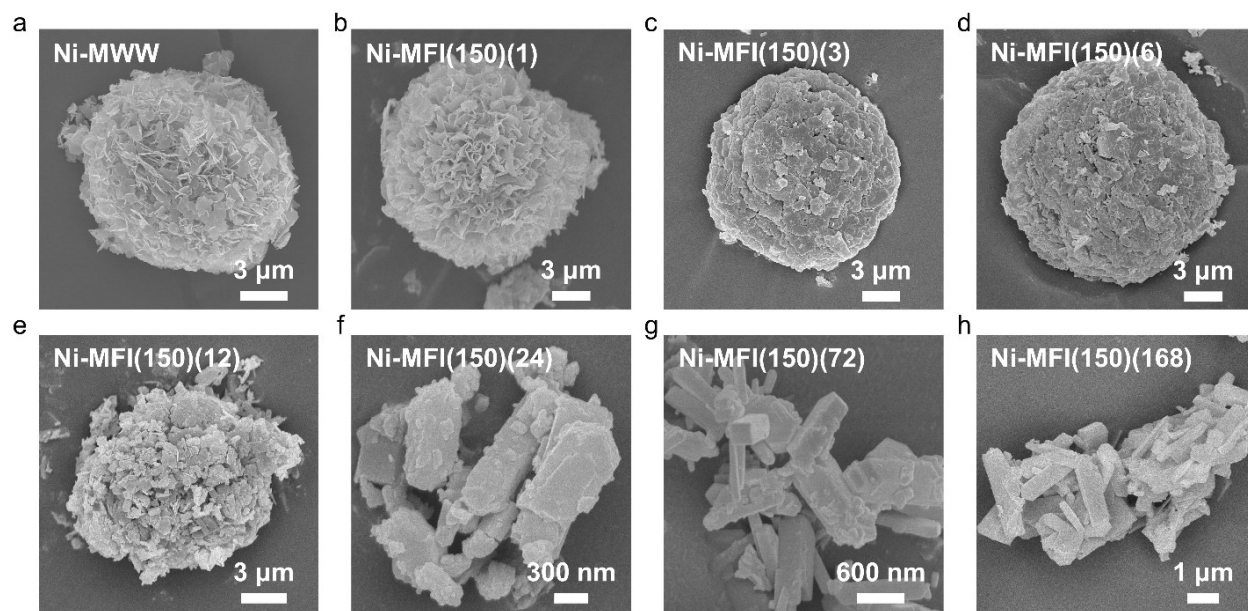

**Fig. S12** SEM images of (a) Ni-MWW and Ni-MFI(x)(y) solids synthesized at 150 °C for (b) 1 h, (c) 3 h, (d) 6 h, (e) 12 h, (f) 24 h, (g) 72 h, and (h) 168 h.

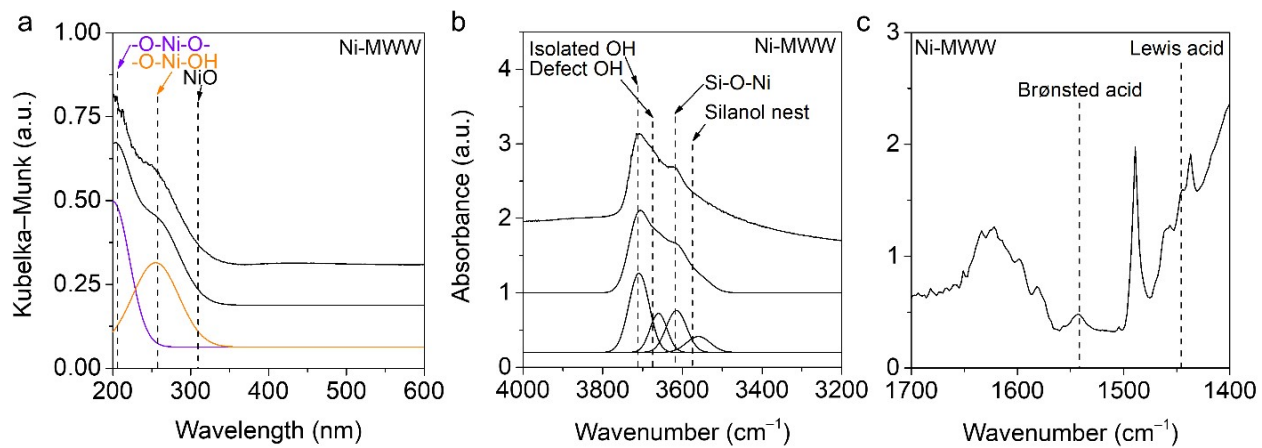

**Fig. S13** (a) UV-DRS and (b) OH-IR spectra: experimental (top), simulated (middle), and deconvoluted components (bottom), and (c) py-IR spectra after pyridine adsorption at 100 °C of Ni-MWW.

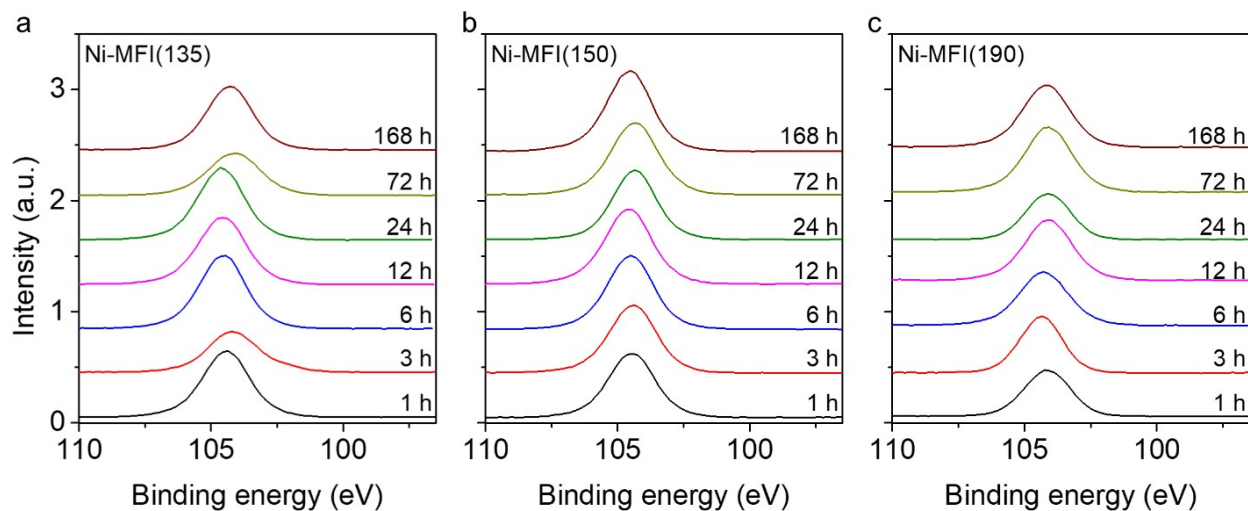

**Fig. S14** Si 2p XPS spectra of Ni-MFI( $x$ )( $y$ ) solids synthesized at (a) 135 °C, (b) 150 °C, and (c) 190 °C for the different crystallization times (1–168 h).

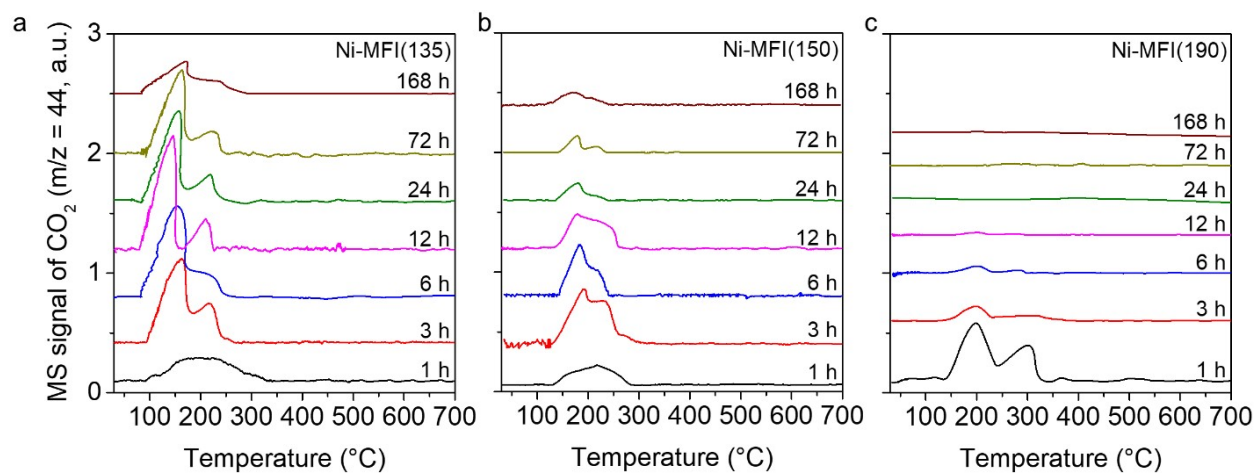

**Fig. S15** CO<sub>2</sub> TPD profiles of Ni-MFI(*x*)(*y*) solids synthesized at (a) 135 °C, (b) 150 °C, and (c) 190 °C for the different crystallization times (1–168 h).

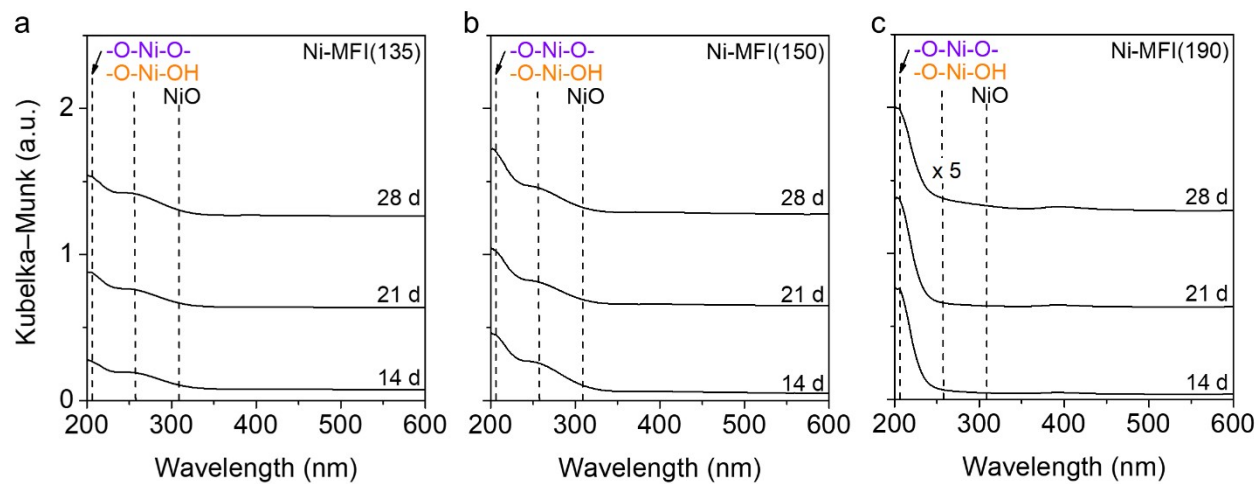

**Fig. S16** UV-DRS spectra of Ni-MFI(x)(y) solids synthesized at (a) 135 °C, (b) 150 °C, and (c) 190 °C for 14–28 d.

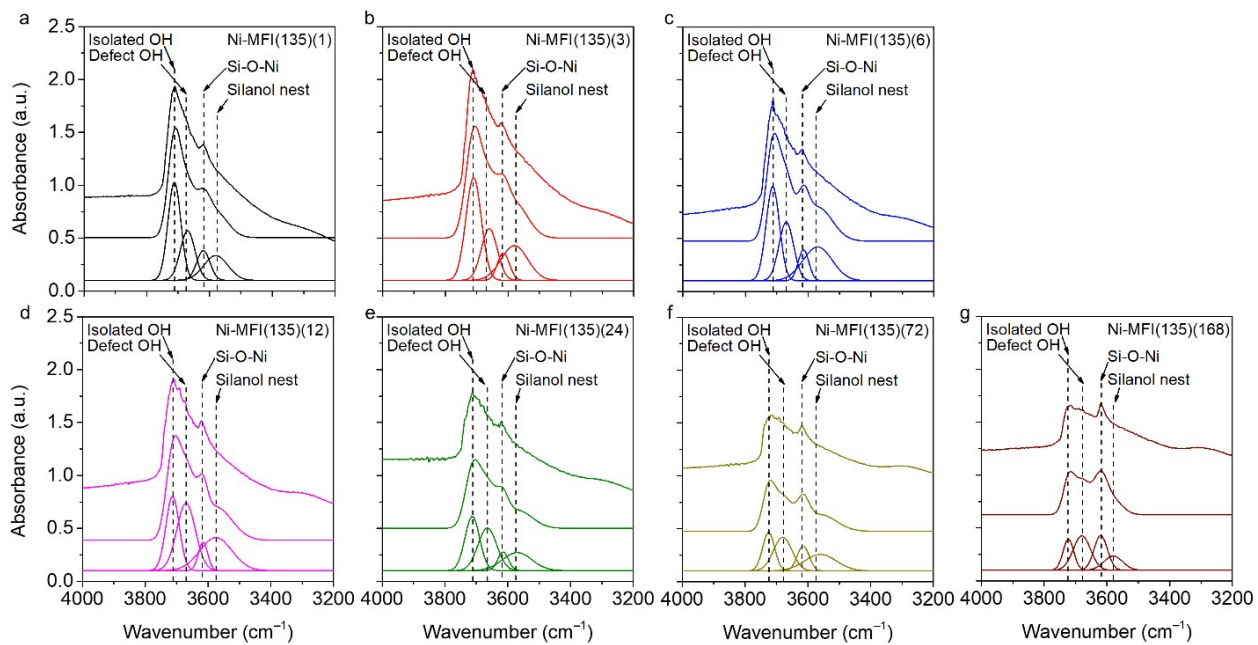

**Fig. S17** IR spectra in the hydroxyl region of Ni-MFI( $x$ )( $y$ ) solids synthesized at 135 °C for (a) 1 h, (b) 3 h, (c) 6 h, (d) 12 h, (e) 24 h, (f) 72 h, and (g) 168 h: experimental (top), simulated (middle), and deconvoluted components (bottom).

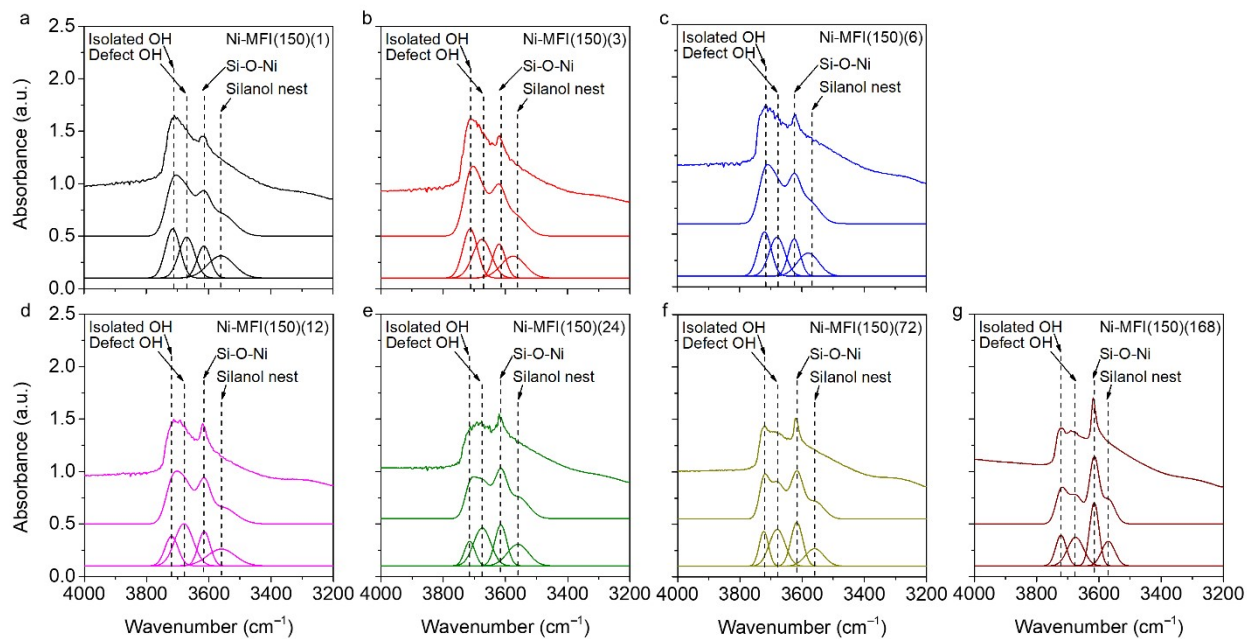

**Fig. S18** IR spectra in the hydroxyl region of Ni-MFI( $x$ )( $y$ ) solids synthesized at 150 °C for (a) 1 h, (b) 3 h, (c) 6 h, (d) 12 h, (e) 24 h, (f) 72 h, and (g) 168 h: experimental (top), simulated (middle), and deconvoluted components (bottom).



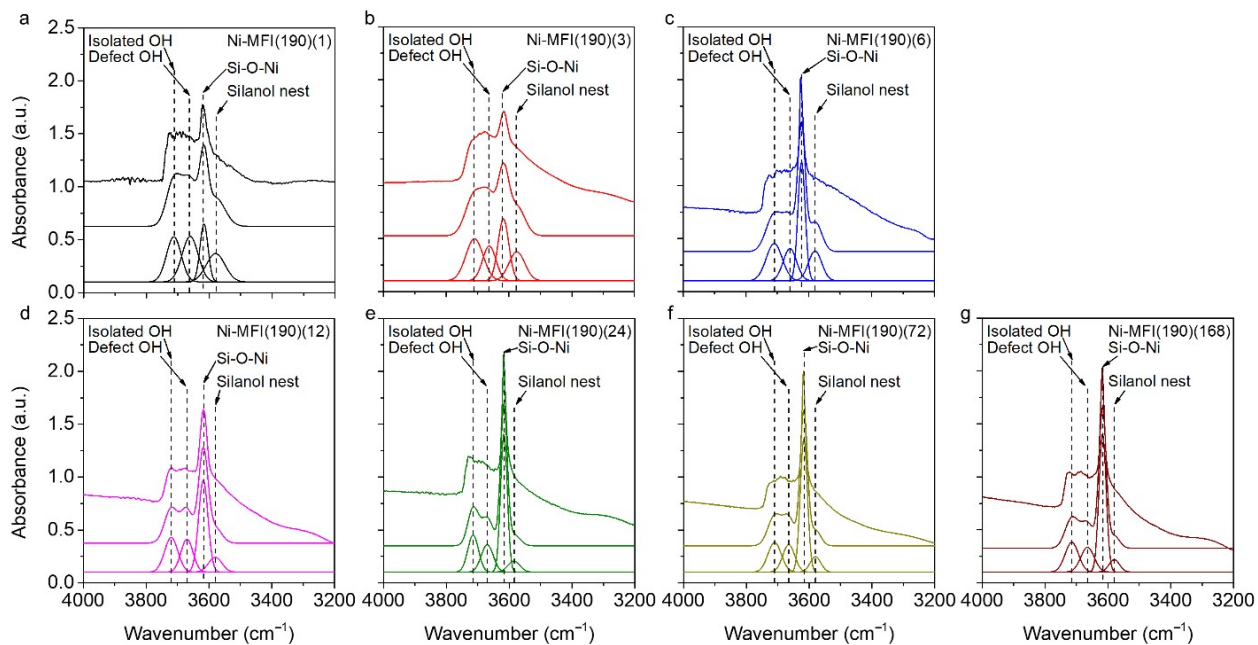

**Fig. S19** IR spectra in the hydroxyl region of Ni-MFI( $x$ )( $y$ ) solids synthesized at 190 °C for (a) 1 h, (b) 3 h, (c) 6 h, (d) 12 h, (e) 24 h, (f) 72 h, and (g) 168 h: experimental (top), simulated (middle), and deconvoluted components (bottom).

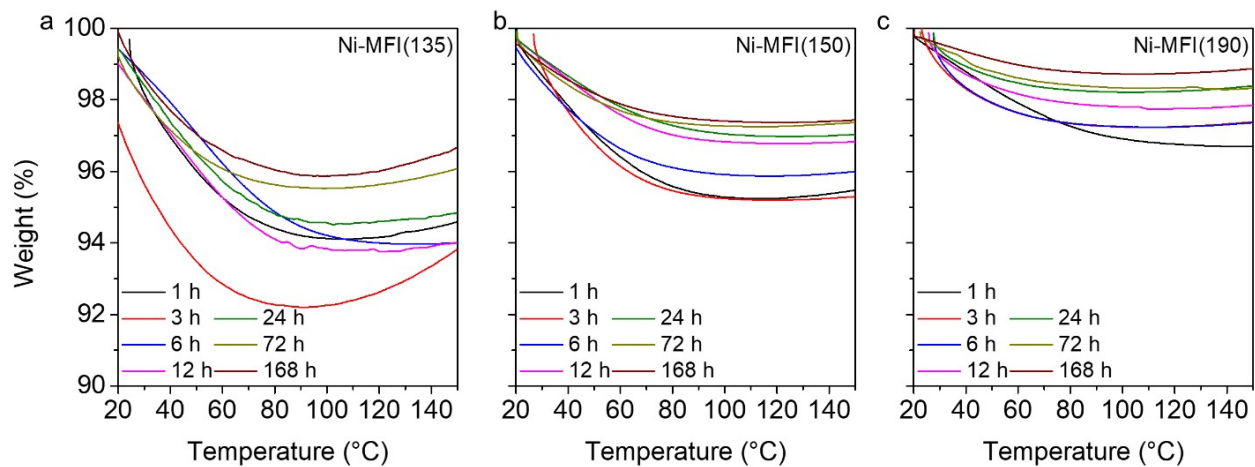

**Fig. S20** TGA curves up to 150 °C of calcined Ni-MFI( $x$ )( $y$ ) solids synthesized at (a) 135 °C, (b) 150 °C, and (c) 190 °C for the different crystallization times (1–168 h). Before the measurements, the calcined samples were exposed for 1 d in ambient condition.

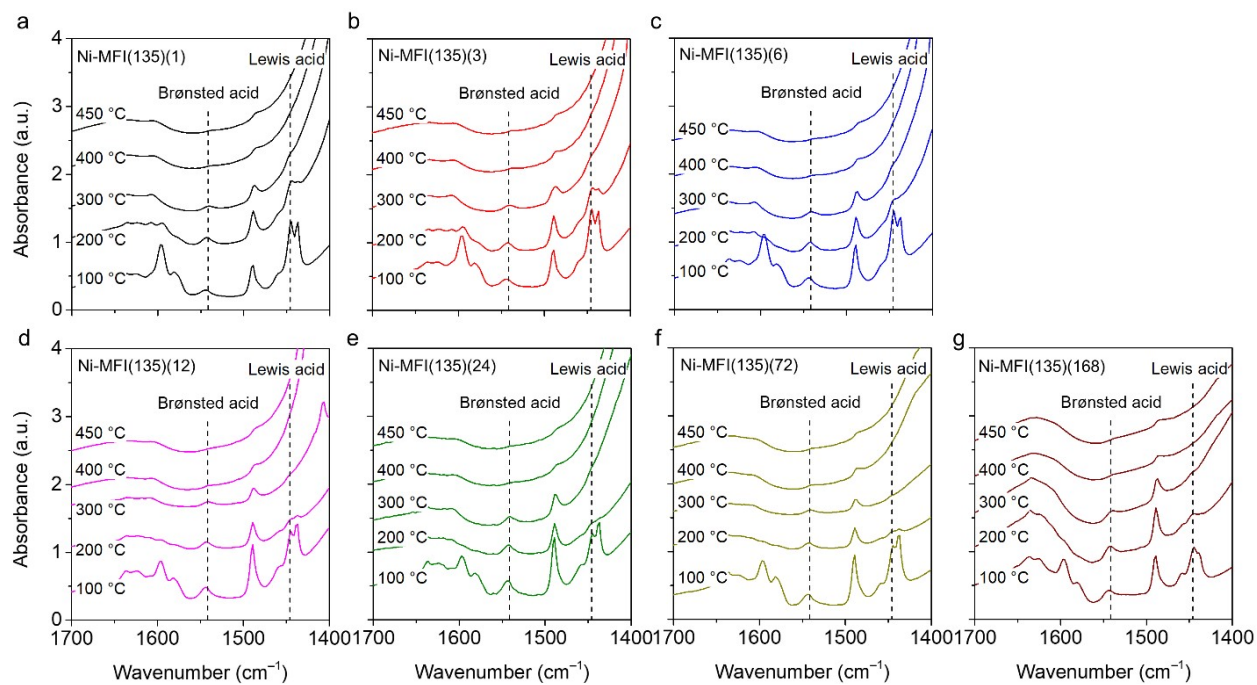

**Fig. S21** IR spectra after pyridine adsorption at 100 °C and subsequent temperature increase up to 450 °C at an interval of 100 °C (100 to 400 °C) and 50 °C (400 to 450 °C) of Ni-MFI( $x$ )( $y$ ) solids synthesized at 135 °C for (a) 1 h, (b) 3 h, (c) 6 h, (d) 12 h, (e) 24 h, (f) 72 h, and (g) 168 h.

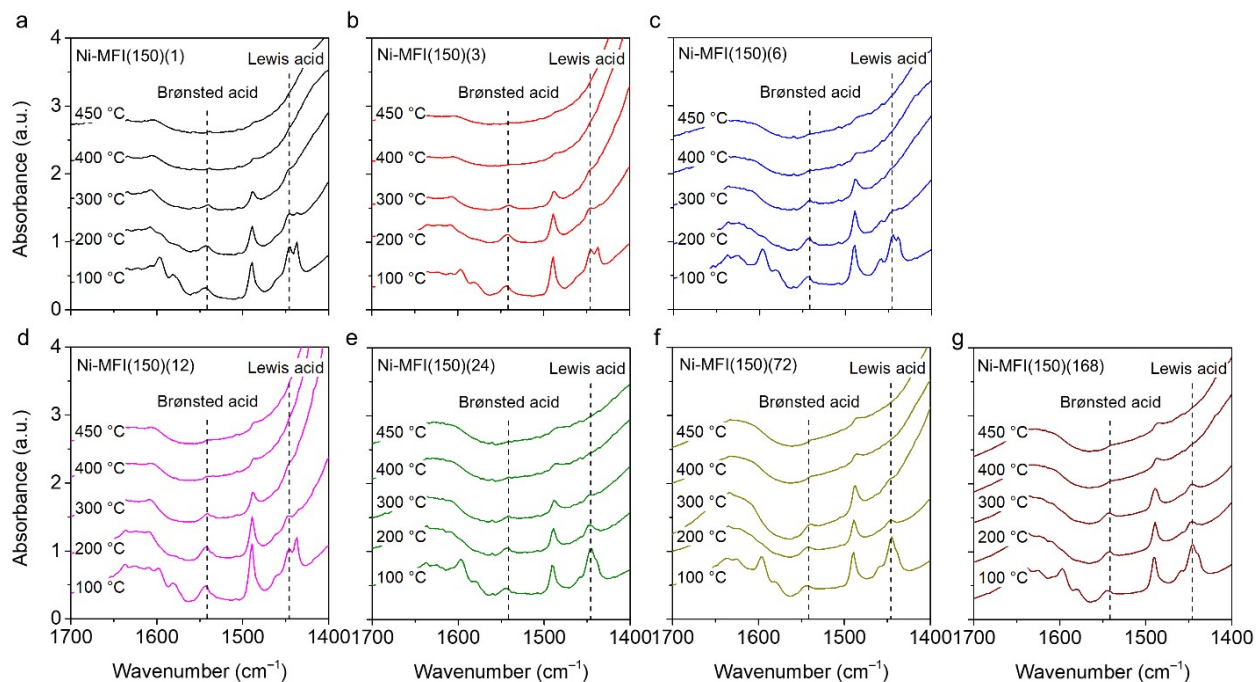

**Fig. S22** IR spectra after pyridine adsorption at 100 °C and subsequent temperature increase up to 450 °C at an interval of 100 °C (100 to 400 °C) and 50 °C (400 to 450 °C) of Ni-MFI(x)(y) solids synthesized at 150 °C for (a) 1 h, (b) 3 h, (c) 6 h, (d) 12 h, (e) 24 h, (f) 72 h, and (g) 168 h.

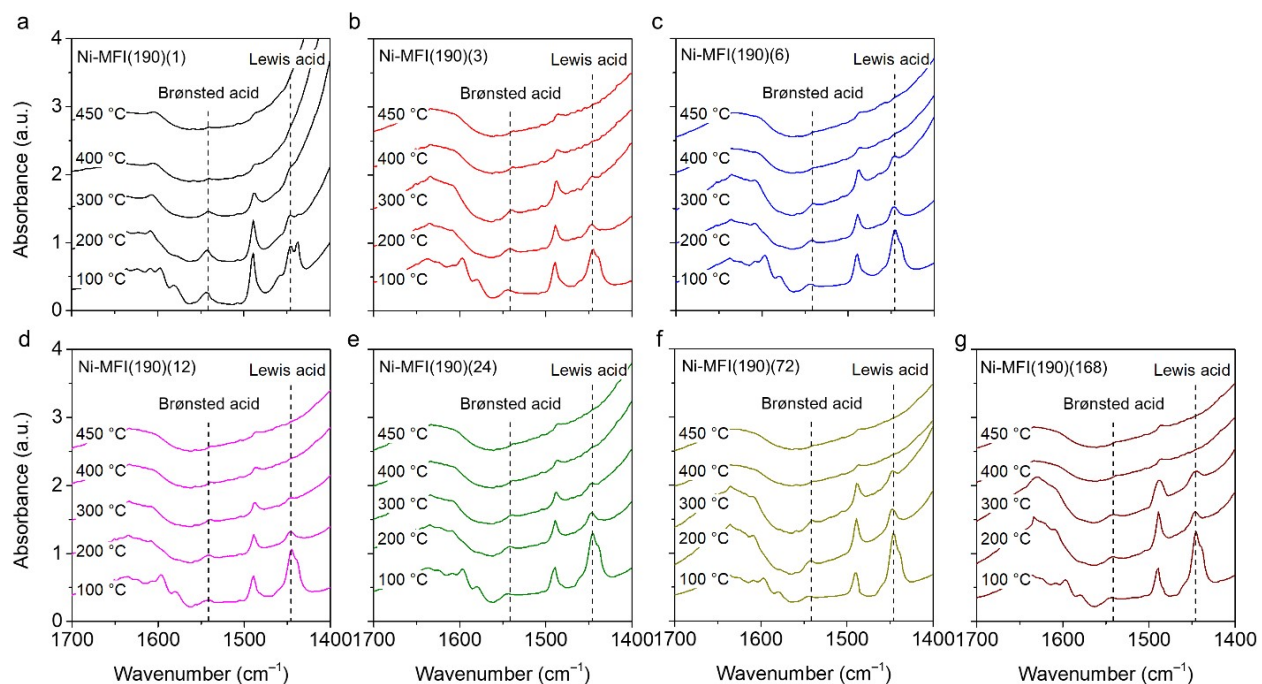

**Fig. S23** IR spectra after pyridine adsorption at 100 °C and subsequent temperature increase up to 450 °C at an interval of 100 °C (100 to 400 °C) and 50 °C (400 to 450 °C) of Ni-MFI( $x$ )( $y$ ) solids synthesized at 190 °C for (a) 1 h, (b) 3 h, (c) 6 h, (d) 12 h, (e) 24 h, (f) 72 h, and (g) 168 h.

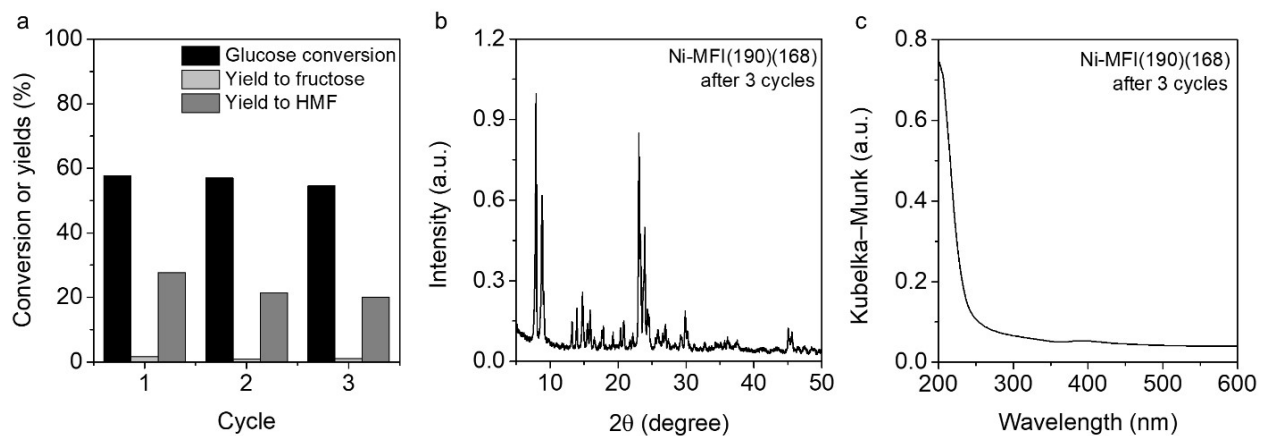

**Fig. S24** (a) Reusability test results of Ni-MFI(190)(168) catalyst at 160 °C for 24 h in three consecutive runs. (b) Powder XRD pattern and (c) UV-DRS spectrum of Ni-MFI(190)(168) after the reusability test.
